# Supplementary material for: Genetic Selection for Context-Dependent Stochastic Phenotypes: Sp1 and TATA Mutations Increase Phenotypic Noise in HIV-1 Gene Expression
Source: PubMed Central journal article supplement (PMC3708878; doi:10.1371/journal.pcbi.1003135), 2013-07-11
Supplement: pcbi.1003135.s003.pdf [file pcbi.1003135.s003.pdf]

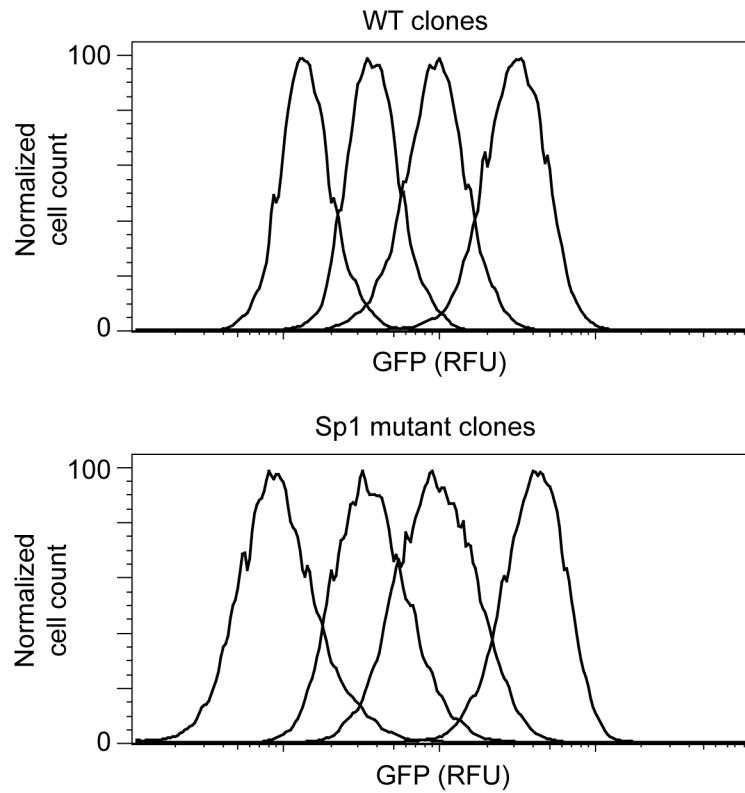

**Figure S3.** Log-binned histograms of clones infected with the WT Tat-null vector and the Sp1 mutant Tat-null vector. Clonal distributions were monomodal and wide with highly skewed distributions, which becomes apparent upon transformation to a real fluorescence axis.
