# Supplementary material for: Genetic Selection for Context-Dependent Stochastic Phenotypes: Sp1 and TATA Mutations Increase Phenotypic Noise in HIV-1 Gene Expression
Source: PubMed Central journal article supplement (PMC3708878; doi:10.1371/journal.pcbi.1003135), 2013-07-11
Supplement: pcbi.1003135.s004.pdf [file pcbi.1003135.s004.pdf]

**Table S1:** Features used in cluster-based analysis of clonal populations

| <b>Feature</b>                             | <b>Reason</b>                                                                  | <b>Additional notes on calculation</b>                                                                                                                                                                                                                                                 |
|--------------------------------------------|--------------------------------------------------------------------------------|----------------------------------------------------------------------------------------------------------------------------------------------------------------------------------------------------------------------------------------------------------------------------------------|
| 1. Median                                  | Measure of distribution center                                                 |                                                                                                                                                                                                                                                                                        |
| 2. Inter-quartile range (IQR)              | Measure of distribution width                                                  |                                                                                                                                                                                                                                                                                        |
| 3. 3 <sup>rd</sup> central moment          | Measure of distribution skew                                                   | The cube root was taken                                                                                                                                                                                                                                                                |
| 4. 4 <sup>th</sup> central moment          | Measure of kurtosis                                                            | The 4 <sup>th</sup> root was taken                                                                                                                                                                                                                                                     |
| 5. Peak separation                         | Measure of bimodality                                                          | Calculated based on smoothed histograms; equal to 0 for mono-modal distributions                                                                                                                                                                                                       |
| 6. Dip                                     | Measure of bimodality                                                          | Equal to the difference between the normalized smoothed histogram maximum and the central minimum between the distribution peaks for bimodal distributions; 0 for mono-modal distributions                                                                                             |
| 7. Dim weight                              | To distinguish Dim and Bright phenotypes                                       | Operationally defined as the area under the normalized log-binned histogram to the left of cytometer bin 320 out of 1024 (covers the majority of the 'Dim' peak of the bulk multi-integration population for the WT transactivation circuit, as well as our auto-fluorescence profile) |
| 8. Product of Dim weight and Bright weight | Measure of clonal distributions that include cells in both fluorescence ranges | Operationally defined as the distribution weight to the right of cytometer bin 512 out of 1024, which covers the majority of the 'Bright' peak of the bulk multi-integration distribution for the WT transactivation circuit, and is well-separated from the 'Dim' peak                |
