# Supplementary material for: Genetic Selection for Context-Dependent Stochastic Phenotypes: Sp1 and TATA Mutations Increase Phenotypic Noise in HIV-1 Gene Expression
Source: PubMed Central journal article supplement (PMC3708878; doi:10.1371/journal.pcbi.1003135), 2013-07-11
Supplement: pcbi.1003135.s005.pdf [file pcbi.1003135.s005.pdf]

**Table S2:** Summary of promoter positions with significant mutation rates following both selection screens<sup>a</sup>

| Position | Site                      | WT Base | # Mutations (Selected library) |            | Expected # Mutations <sup>b</sup> (Unselected library) |            | Log <sub>10</sub> (p-value) (pairwise) <sup>c</sup> |            | Log <sub>10</sub> (Min p-value <sup>2</sup> ) <sup>d</sup> |
|----------|---------------------------|---------|--------------------------------|------------|--------------------------------------------------------|------------|-----------------------------------------------------|------------|------------------------------------------------------------|
|          |                           |         | Activate                       | Deactivate | Activate                                               | Deactivate | Activate                                            | Deactivate | Combined                                                   |
| 380      | Sp1 III, p4               | G       | 15                             | 10         | 0.225                                                  | 0.235      | <-25                                                | -12.7      | -25.5                                                      |
| 426      | TATA, p2                  | A       | 9                              | 6          | 0.917                                                  | 0.958      | -6.29                                               | -3.28      | -6.56                                                      |
| 412      | Core (n.i. <sup>e</sup> ) | C       | 3                              | 19         | 0.173                                                  | 0.179      | -3.10                                               | <-25       | -6.20                                                      |
| 382      | Sp1 III, p6               | G       | 10                             | 3          | 0.218                                                  | 0.235      | -13.1                                               | -2.72      | -5.43                                                      |
| 391      | Sp1 II, p4                | G       | 3                              | 3          | 0.225                                                  | 0.235      | -2.77                                               | -2.72      | -5.43                                                      |
| 192      | U3 (n.i.)                 | A       | 5                              | 17         | 0.917                                                  | 0.958      | -2.54                                               | -15.5      | -5.07                                                      |
| 431      | TATA, p7                  | A       | 5                              | 5          | 0.917                                                  | 0.958      | -2.54                                               | -2.45      | -4.90                                                      |

- Mutated positions were considered significant if both pairwise p-values < -2 ( $p < 0.01$ ) and the  $\log_{10}(\min p\text{-value}^2) < -4$ .
- Expected mutation rate is base-type specific but not position-specific in the initial library.
- Pairwise comparison of mutation rates between an individual screen and the unselected library
- Log<sub>10</sub> of the square of the minimum of the pairwise p-values, which is a measure of the probability of the weaker screen giving that p-value or better, under the null hypothesis that the all 3 rates are the same.
- n.i. = Not identified
