# Supplementary material for: Genetic Selection for Context-Dependent Stochastic Phenotypes: Sp1 and TATA Mutations Increase Phenotypic Noise in HIV-1 Gene Expression
Source: PubMed Central journal article supplement (PMC3708878; doi:10.1371/journal.pcbi.1003135), 2013-07-11
Supplement: pcbi.1003135.s006.pdf [file pcbi.1003135.s006.pdf]

**Table S3:** Summary of LTR single point mutations

| <b>Mutant Name</b> | <b>WT TFBS sequence<sup>1</sup></b> | <b>Mutation</b> |
|--------------------|-------------------------------------|-----------------|
| Sp1 site III (S3)  | GAG <b>G</b> CGTGGC                 | G to A          |
| TB position 2      | C <b>A</b> TATAAG                   | A to G          |

*1. Mutated positions are in bold*
